# Supplementary material for: Post-intervention acceptability of multicomponent intervention for management of hypertension in rural Bangladesh, Pakistan, and Sri Lanka- a qualitative study
Source: PLOS journal article supplement (doi:10.1371/journal.pone.0280455), 2023-01-19
Supplement: S7 (10.1371/journal.pone.0280455.s007) [file journal.pone.0280455.s007]

## **PATIENT INTERVIEW PROBES**

### **a) Experience during CHW visit**

Could you tell me, when the CHW visited you in the past 2 to 3 months, what did they talk to you about? For example:

- Obesity
- High blood pressure
- Physical activity

If you were referred to a GP, were you **satisfied** with the **referral process**?

### **b) Comparing usual care to CHW visit**

Was this visit by the CHW **any different** from your usual visits by CHWs?

- If yes, how was it different?
- What additional services did the CHW provide?
- Were the topics discussed different? Did the CHW tell you something new about blood pressure that you didn't already know?
- Did you like what was different during the visit?
- If your BP was elevated, were you referred to the GP?
- Were you given a referral checklist to visit the GP? Did you bring it with you to the GP?

### **c) Perceived usefulness of CHW visit**

Was the information shared with you regarding your high blood pressure by the CHW useful to you?

- Were you able to understand what the CHW was telling you?
  - If no, what was unclear?
- Are you able to do the things that your CHW has advised you to do? (e.g. lifestyle changes, taking your medications)

Did you **feel** the referral process from CHW to GP was **useful**?

### **d) Experience during intervention visit to GP**

Could you tell me, when you visited your healthcare provider (MLP or PP), what did your doctor/provider discuss with you about your blood pressure during your clinic visit? For example:

- Current blood pressure level
- Explaining disease condition
- Medication, e.g. how to take your medication, what side effects are experienced, what side effects are expected
- Lifestyle advice

### **e) Perceived usefulness of intervention visits to GP**

Was the **information shared** with you regarding your high blood pressure **useful** to you?

- Were you **able to understand** what your doctor/provider was telling you?
- **Are you able to do** the things that your doctor/provider has advised you to do? (e.g. lifestyle changes, taking your medications)
  - Why was it difficult to follow?

- After that session, do you **feel** that you **understand your condition better**, including how to manage this condition?
- If no, what do you need to know about the condition?

**f) Overall attitude and confidence about managing one's blood pressure**

Overall, do you **feel you understand** your blood pressure condition?

- If not, what else would you need to know?

Do you **feel confident** about **managing your blood pressure**?

- If not, what else would you need?
